# Supplementary material for: The epilepsy-associated protein PCDH19 undergoes NMDA receptor-dependent proteolytic cleavage and regulates the expression of immediate-early genes
Source: PubMed Central journal article supplement (PMC9152703; doi:10.1016/j.celrep.2022.110857), 2022-05-24
Supplement: mmc1.pdf [file mmc1.pdf]

**Supplemental information**

**The epilepsy-associated protein PCDH19 undergoes  
NMDA receptor-dependent proteolytic cleavage  
and regulates the expression of immediate-early genes**

**Laura Gerosa, Sara Mazzoleni, Francesco Rusconi, Alessandra Longaretti, Elly Lewerissa, Silvia Pelucchi, Luca Murru, Serena Gea Giannelli, Vania Broccoli, Elena Marcello, Nael Nadif Kasri, Elena Battaglioli, Maria Passafaro, and Silvia Bassani**

**A**

Endogenous PCDH19  
(DIV22)

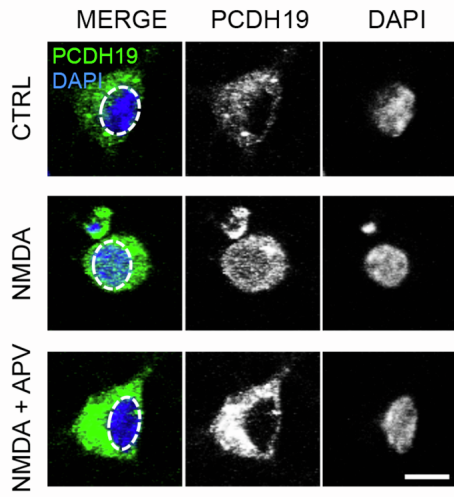**B**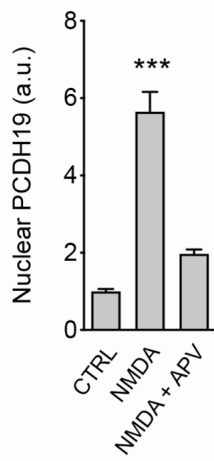**C**

Overexpressed PCDH19-V5  
(DIV12)

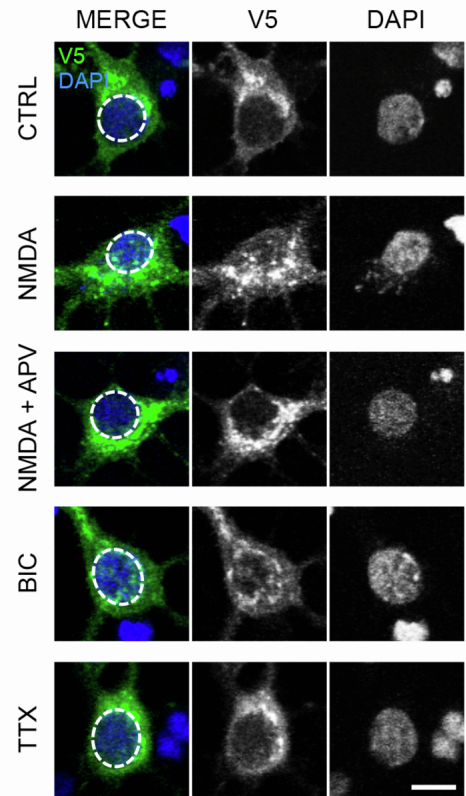**D**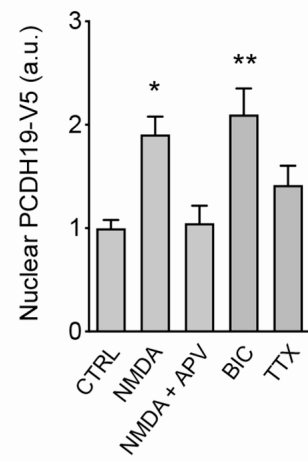

**Figure S1. PCDH19 intracellular distribution changes following NMDAR activation in mature neurons expressing endogenous PCDH19 and developing neurons overexpressing PCDH19, Related to Figure 1**

(A) Representative images of hippocampal neurons somata and nuclei at DIV 22 immunolabeled for PCDH19 and stained with DAPI, showing PCDH19 distribution after treatments with NMDA, NMDA + APV or vehicle (CTRL). Scale bar, 10  $\mu$ m.

(B) Quantification of PCDH19 nuclear expression (n, CTRL 9, NMDA 11, NMDA + APV 9; CTRL vs. NMDA \*\*\* $p < 0.001$ , one-way ANOVA and Dunnett's *post hoc* test). Data are presented as mean  $\pm$  SEM.

(C) Representative images of hippocampal neurons somata and nuclei from neurons at DIV 12 previously transfected (DIV 4) with PCDH19-V5 and immunolabeled for V5 and stained with DAPI, showing PCDH19 distribution after treatments, as indicated. Scale bar, 10  $\mu$ m.

(D) Quantification of PCDH19 nuclear expression (n, CTRL 10, NMDA 21, NMDA + APV 6, BIC 17, TTX 13; CTRL vs. NMDA \* $p < 0.05$ , CTRL vs. BIC \*\* $p < 0.01$ , one-way ANOVA and Dunnett's *post hoc* test). Data are presented as mean  $\pm$  SEM.

Values are shown in Table S8.

**A**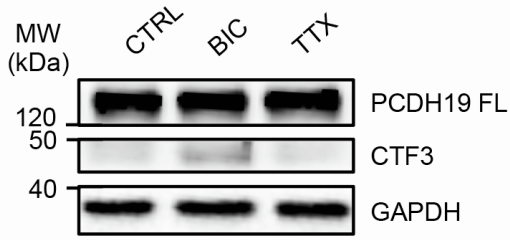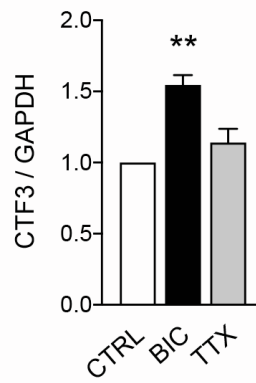**B**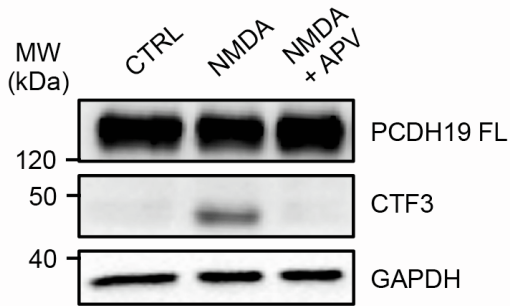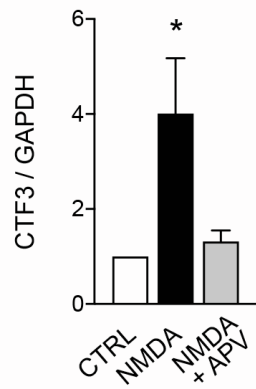**C**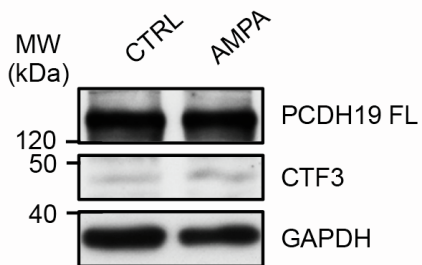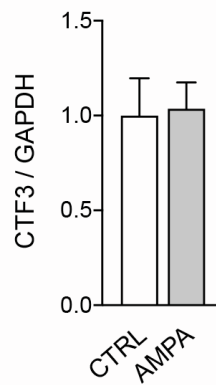**D**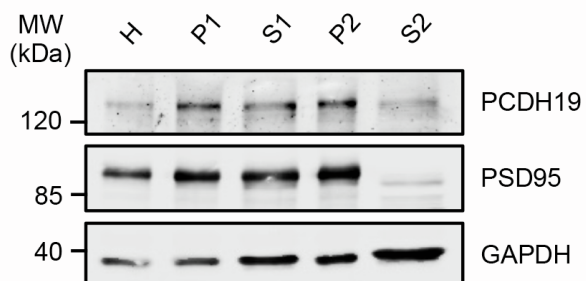

**Figure S2. PCDH19 proteolytic cleavage in hippocampal neurons and PCDH19 expression in crude synaptosomes, Related to Figure 2**

(A) Representative western blots of primary hippocampal neurons at DIV 12 treated with vehicle (CTRL), BIC or TTX and quantification of PCDH19 CTF3 (n = 3; \*\*p < 0.01, one-way ANOVA and Dunnett's *post hoc* test). GAPDH is used as loading control. Data are presented as mean ± SEM.

(B) Western blots of primary hippocampal neurons at DIV 12 treated with vehicle (CTRL), NMDA or NMDA + APV and quantification of PCDH19 CTF3 (n = 5; \*p < 0.05, one-way ANOVA and Dunnett's *post hoc* test). Data are presented as mean ± SEM.

(C) Western blots of primary hippocampal neurons at DIV 12 treated with vehicle (CTRL) or AMPA and quantification of PCDH19 CTF3 (n = 3; p > 0.05, n.s., Student t test). Data are presented as mean ± SEM.

(D) Representative western blot of crude synaptosomes from rat brain (hippocampus and cortex). PSD95 is used as postsynaptic protein and GAPDH as loading control. H, total homogenate; P, pellet; S, supernatant. P2 fraction contains crude synaptosomes.

Values are shown in Table S8.

**A**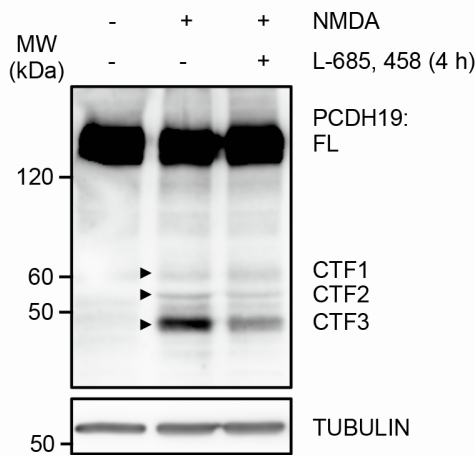**B**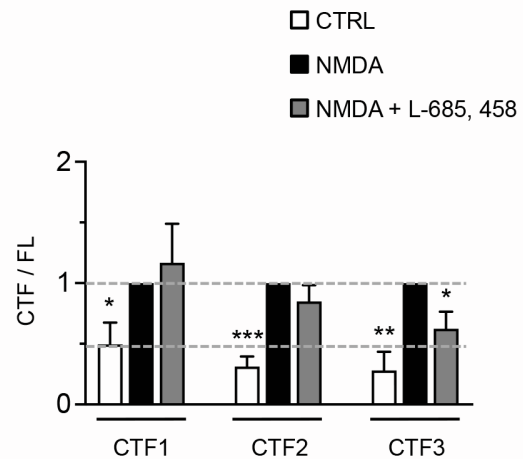**C**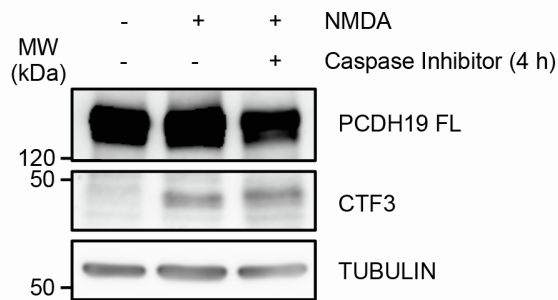**D**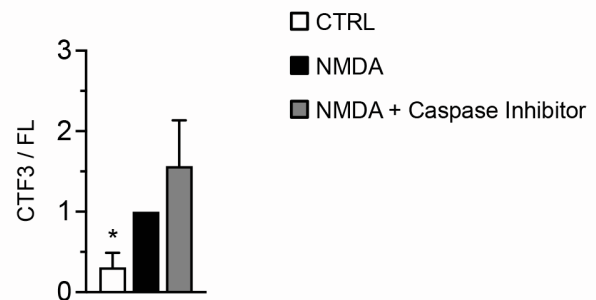

**Figure S3. PCDH19 CTF3 level is reduced by gamma secretase inhibitor L-685, 458 but not by caspase inhibitor, Related to Figure 3**

(A) Western blots of primary hippocampal neurons at DIV 12 treated with NMDA (6 min) NMDA + L-685, 458 (4 h) or vehicle (CTRL).

(B) Quantification of PCDH19 CTFs in western blots as in A (CTF1 / FL: n = 4; \*p < 0.05, Student t test, CTRL compared with NMDA; CTF2 / FL: n = 4; \*\*\*p < 0.001, Student t test, CTRL compared with NMDA; CTF3 / FL: n = 4; \*\*p < 0.01, Student t test, CTRL compared with NMDA; \*p < 0.05, Student t test, NMDA + L-685, 458 compared with NMDA). Data are presented as mean  $\pm$  SEM.

(C) Western blots of primary hippocampal neurons at DIV 12 treated with NMDA (6 min) NMDA + caspase inhibitor (4 h) or vehicle (CTRL).

(D) Quantification of PCDH19 CTF3 in western blots as in A (CTF3 / FL: n = 3; \*p < 0.05, Student t test). Data are presented as mean  $\pm$  SEM.

Values are shown in Table S8.

**A**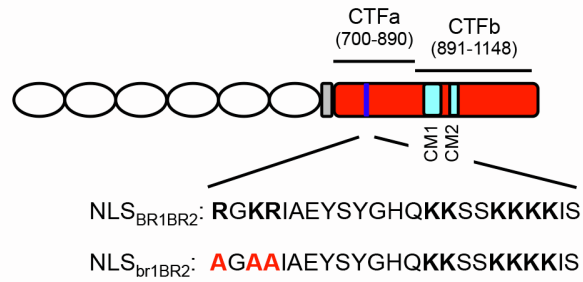**B**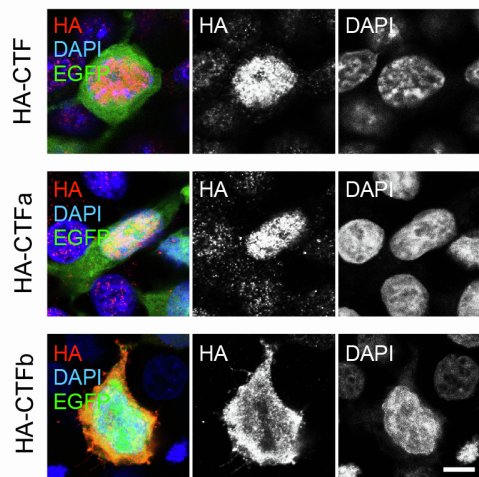**C**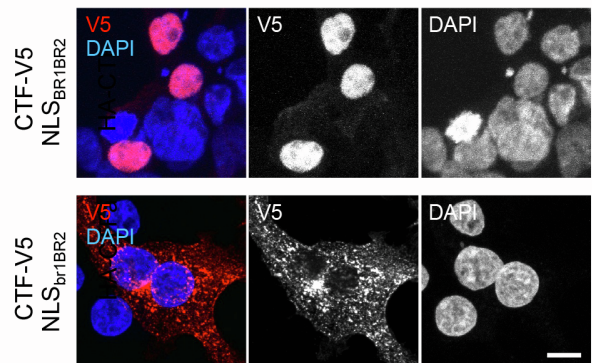**D**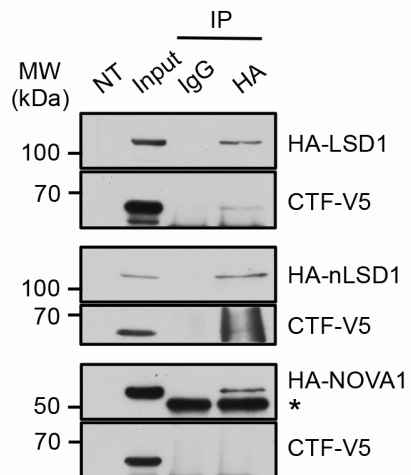**E**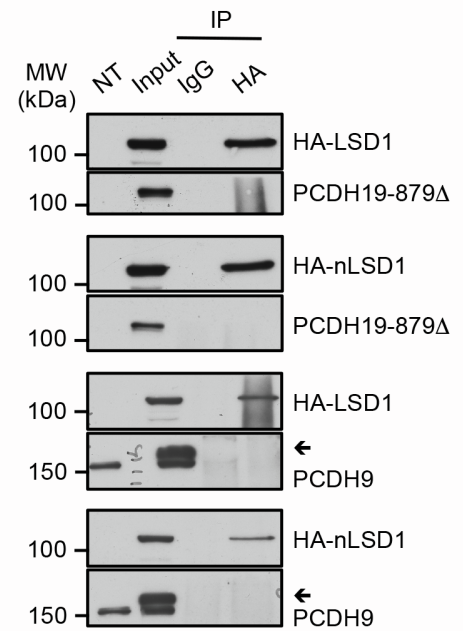

**Figure S4. PCDH19 CTF enters the nucleus and associates with LSD1 in HEK cells, Related to Figures 4 and 5**

(A) Scheme of PCDH19 structure, showing PCDH19 intracellular C-terminus (CTF, red) with the nuclear localization signal (dark blue) and the conserved regions CM1 and CM2 (light blue). The amino acids composing the two basic regions of the bipartite NLS (NLS<sub>BR1BR2</sub>, BR = basic region) are in bold, with the mutated amino acids in red.

(B) HEK cells transfected with HA-CTF, HA-CTFa and HA-CTFb together with pEGFP and stained with HA and DAPI. Scale bar, 10  $\mu$ m.

(C) HEK cells transfected with wild type CTF-V5 (CTF-V5 NLS<sub>BR1BR2</sub>) or CTF-V5 with mutated NLS (CTF-V5 NLS<sub>br1BR2</sub>) and stained with V5 and DAPI. Scale bar, 10  $\mu$ m.

(D) CoIP in HEK cells cotransfected with HA-LSD1/HA-nLSD1 and CTF-V5 or HA-NOVA1 and CTF-V5, as indicated. Input: 10 % of IP volume. IP: anti-IgG or anti-HA. Western blots probed for HA or V5. The star indicates IgG chains signal. NT, lysate from untransfected cells.

(E) CoIP in HEK cells cotransfected with HA-LSD1 and PCDH19-879 $\Delta$ , HA-nLSD1 and PCDH19-879 $\Delta$ , HA-LSD1 and PCDH9, or HA-nLSD1 and PCDH9, as indicated. Input: 10 % of IP volume. IP: anti-IgG or anti-HA. Western blots probed for HA, PCDH19 or PCDH9. The arrow indicates PCDH9 specific band, above of an aspecific signal. NT, lysate from untransfected cells.

Values are shown in Table S8.



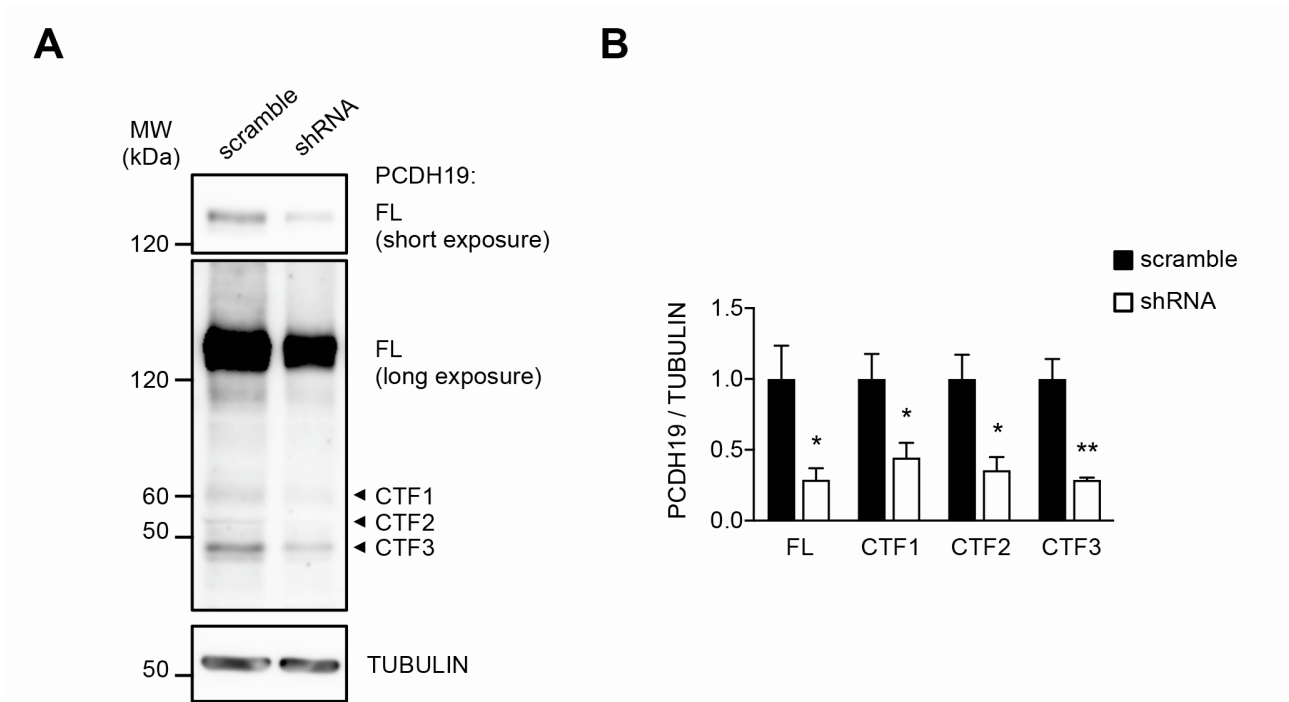

**Figure S5. PCDH19 shRNA reduces PCDH19 FL and CTFs levels, Related to Figure 6**

(A) Representative western blot of neurons transduced with PCDH19 shRNA (shRNA) or control shRNA (scramble). Neurons were treated with NMDA (50  $\mu$ M, 6 min).

(B) Quantification of PCDH19 FL and CTFs expression in western blots as in A (PCDH19 / TUBULIN: n = 5; \*p < 0.05, \*\*p < 0.01, Student t test). Data are presented as mean  $\pm$  SEM. Values are shown in Table S8.

**Table S1. Mean values, SEM, number of samples and p values of data displayed in Figure 1, Related to Figure 1**

| <b>Fig. 1C</b><br><b>Dendritic PCDH19</b> | Mean  | SEM   | N   | p value<br>(One-way ANOVA & Dunnett's <i>post hoc</i> )                                                                                                                        |
|-------------------------------------------|-------|-------|-----|--------------------------------------------------------------------------------------------------------------------------------------------------------------------------------|
| CTRL                                      | 1.000 | 0.033 | 17  | CTRL vs.:<br>BIC p = 0.004 (**)<br>NMDA p = 0.019 (*)<br>NMDA + APV p > 0.05 (n.s.)                                                                                            |
| BIC                                       | 0.764 | 0.045 | 23  |                                                                                                                                                                                |
| NMDA                                      | 0.805 | 0.036 | 26  |                                                                                                                                                                                |
| NMDA + APV                                | 1.017 | 0.060 | 26  |                                                                                                                                                                                |
| <b>Fig. 1D</b><br><b>Nuclear PCDH19</b>   | Mean  | SEM   | N   | p value<br>(One-way ANOVA & Dunnett's <i>post hoc</i> )                                                                                                                        |
| CTRL                                      | 1.000 | 0.062 | 152 | CTRL vs.:<br>BIC p < 0.001 (***)<br>TTX p > 0.05 (n.s.)<br>NMDA p < 0.001 (***)<br>NMDA + APV p > 0.05 (n.s.)<br>SYN. NMDAR p < 0.001 (***)<br>EXTRASYN. NMDAR p > 0.05 (n.s.) |
| BIC                                       | 1.808 | 0.127 | 20  |                                                                                                                                                                                |
| TTX                                       | 0.998 | 0.113 | 19  |                                                                                                                                                                                |
| NMDA                                      | 1.740 | 0.123 | 47  |                                                                                                                                                                                |
| NMDA + APV                                | 1.151 | 0.114 | 31  |                                                                                                                                                                                |
| SYN. NMDAR                                | 1.529 | 0.150 | 61  |                                                                                                                                                                                |
| EXTRASYN. NMDAR                           | 1.160 | 0.118 | 56  |                                                                                                                                                                                |

**Table S2. Mean values, SEM, number of samples and p values of data displayed in Figure 2, Related to Figure 2**

| <b>Fig. 2A</b><br><b>PCDH19 FL /</b><br><b>GAPDH</b> | Mean   | SEM   | N | p value<br>(One-way ANOVA & Tukey's <i>post hoc</i> )                                                                               |
|------------------------------------------------------|--------|-------|---|-------------------------------------------------------------------------------------------------------------------------------------|
| CTRL                                                 | 1.000  | 0.000 | 8 | CTRL vs. NMDA p < 0.01 (**)<br>CTRL vs. NMDA<br>+ APV p > 0.05 (n.s.)<br>NMDA vs. NMDA<br>+ APV p < 0.05 (*)                        |
| NMDA                                                 | 0.573  | 0.085 | 8 |                                                                                                                                     |
| NMDA + APV                                           | 0.909  | 0.104 | 7 |                                                                                                                                     |
| <b>PCDH19 FL / TfR</b>                               | Mean   | SEM   | N | p value<br>(One-way ANOVA & Tukey's <i>post hoc</i> )                                                                               |
| CTRL                                                 | 1.000  | 0.000 | 4 | CTRL vs. NMDA p < 0.01 (**)<br>CTRL vs. NMDA<br>+ APV p > 0.05 (n.s.)<br>NMDA vs. NMDA<br>+ APV p < 0.05 (*)                        |
| NMDA                                                 | 0.536  | 0.113 | 4 |                                                                                                                                     |
| NMDA + APV                                           | 0.914  | 0.061 | 4 |                                                                                                                                     |
| <b>Fig. 2B</b><br><b>PCDH19 (CTF / FL)</b>           | Mean   | SEM   | N | p value<br>(Student t test)                                                                                                         |
| CTF1 (CTRL)                                          | 1.000  | 0.733 | 4 | CTF1<br>(CTRL vs. NMDA) p > 0.05 (n.s.)                                                                                             |
| CTF1 (NMDA)                                          | 2.507  | 1.460 | 4 |                                                                                                                                     |
| CTF2 (CTRL)                                          | 0.570  | 0.479 | 4 | CTF2<br>(CTRL vs. NMDA) p > 0.05 (n.s.)                                                                                             |
| CTF2 (NMDA)                                          | 3.329  | 2.000 | 4 |                                                                                                                                     |
| CTF3 (CTRL)                                          | 1.056  | 0.532 | 4 | CTF3<br>(CTRL vs. NMDA) p = 0.017 (*)                                                                                               |
| CTF3 (NMDA)                                          | 8.789  | 2.312 | 4 |                                                                                                                                     |
| CTF1 (CTRL) +MG                                      | 0.342  | 0.088 | 3 | CTF1<br>(CTRL vs. NMDA) p > 0.05 (n.s.)                                                                                             |
| CTF1 (NMDA) +MG                                      | 3.793  | 2.288 | 3 |                                                                                                                                     |
| CTF2 (CTRL) +MG                                      | 0.386  | 0.288 | 4 | CTF2<br>(CTRL vs. NMDA) p = 0.006 (**)                                                                                              |
| CTF2 (NMDA) +MG                                      | 4.634  | 0.983 | 4 |                                                                                                                                     |
| CTF3 (CTRL) +MG                                      | 1.254  | 0.815 | 4 | CTF3<br>(CTRL vs. NMDA) p = 0.028 (*)                                                                                               |
| CTF3 (NMDA) +MG                                      | 14.148 | 4.906 | 3 |                                                                                                                                     |
| <b>Fig. 2C</b><br><b>PCDH19 FL /</b><br><b>GAPDH</b> | Mean   | SEM   | N | p value<br>(One-way ANOVA & Dunnett's <i>post hoc</i> )                                                                             |
| CTRL (C)                                             | 1.000  | 0.000 | 4 | CTRL vs.<br>3 min p > 0.05 (n.s.)<br>6 min p > 0.05 (n.s.)<br>10 min p < 0.05 (*)<br>20 min p > 0.05 (n.s.)<br>30 min p < 0.01 (**) |
| 3 min                                                | 1.031  | 0.102 | 4 |                                                                                                                                     |
| 6 min                                                | 0.868  | 0.124 | 4 |                                                                                                                                     |
| 10 min                                               | 0.684  | 0.091 | 4 |                                                                                                                                     |
| 20 min                                               | 0.693  | 0.048 | 4 |                                                                                                                                     |
| 30 min                                               | 0.522  | 0.049 | 4 |                                                                                                                                     |
| <b>CTF3 / GAPDH</b>                                  | Mean   | SEM   | N | p value<br>(One-way ANOVA & Dunnett's <i>post hoc</i> )                                                                             |
| CTRL (C)                                             | 1.000  | 0.000 | 4 | CTRL vs.                                                                                                                            |

|                                                            |        |       |   |                             |                 |
|------------------------------------------------------------|--------|-------|---|-----------------------------|-----------------|
| 3 min                                                      | 11.405 | 2.325 | 4 | 3 min                       | p > 0.05 (n.s.) |
| 6 min                                                      | 19.110 | 3.343 | 4 | 6 min                       | p < 0.05 (*)    |
| 10 min                                                     | 23.769 | 3.565 | 4 | 10 min                      | p < 0.01 (**)   |
| 20 min                                                     | 39.834 | 5.825 | 4 | 20 min                      | p < 0.001 (***) |
| 30 min                                                     | 23.966 | 6.653 | 4 | 30 min                      | p < 0.01 (**)   |
| <b>Fig. 2D</b><br><b>CTF2 / FL</b><br><b>(NMDA / CTRL)</b> | Mean   | SEM   | N | p value<br>(Student t test) |                 |
| H                                                          | 1.654  | 0.481 | 3 |                             |                 |
| TIF                                                        | 3.265  | 0.153 | 3 | H vs. TIF                   | p = 0.032 (*)   |

**Table S3. Mean values, SEM, number of samples and p values of data displayed in Figure 3, Related to Figure 3**

| <b>Fig. 3B<br/>PCDH19<br/>(CTF1 / FL)</b> | Mean   | SEM   | N   | p value<br>(Student t test)                                |
|-------------------------------------------|--------|-------|-----|------------------------------------------------------------|
| CTRL                                      | 0.169  | 0.040 | 4   | CTRL vs. NMDA<br>p < 0.001 (***)                           |
| NMDA                                      | 1.000  | 0.000 | 4-5 |                                                            |
| NMDA + GM6001                             | 0.186  | 0.058 | 5   | NMDA + GM6001 vs. NMDA<br>p < 0.001 (***)                  |
| NMDA +<br>GI254023X                       | 0.152  | 0.059 | 4   | NMDA + GI254023X vs. NMDA<br>p < 0.001 (***)               |
| NMDA + DAPT                               | 1.066  | 0.064 | 5   | NMDA + DAPT vs. NMDA<br>p > 0.05 (n.s.)                    |
| <b>PCDH19<br/>(CTF2 / FL)</b>             | Mean   | SEM   | N   | p value<br>(Student t test)                                |
| CTRL                                      | 0.095  | 0.053 | 5   | CTRL vs. NMDA<br>p < 0.001 (***)                           |
| NMDA                                      | 1.000  | 0.000 | 5-6 |                                                            |
| NMDA + GM6001                             | 0.110  | 0.027 | 6   | NMDA + GM6001 vs. NMDA<br>p < 0.001 (***)                  |
| NMDA +<br>GI254023X                       | 0.078  | 0.031 | 5   | NMDA + GI254023X vs. NMDA<br>p < 0.001 (***)               |
| NMDA + DAPT                               | 1.002  | 0.087 | 6   | NMDA + DAPT vs. NMDA<br>p > 0.05 (n.s.)                    |
| <b>PCDH19<br/>(CTF3 / FL)</b>             | Mean   | SEM   | N   | p value<br>(Student t test)                                |
| CTRL                                      | 0.177  | 0.123 | 4   | CTRL vs. NMDA<br>p < 0.001 (***)                           |
| NMDA                                      | 1.000  | 0.000 | 3-8 |                                                            |
| NMDA + GM6001                             | 0.689  | 0.081 | 6   | NMDA + GM6001 vs. NMDA<br>p = 0.003 (**)                   |
| NMDA +<br>GI254023X                       | 0.560  | 0.153 | 3   | NMDA + GI254023X vs. NMDA<br>p = 0.045 (*)                 |
| NMDA + DAPT                               | 0.809  | 0.045 | 8   | NMDA + DAPT vs. NMDA<br>p < 0.001 (***)                    |
| <b>Fig. 3D<br/>PCDH19<br/>(CTF1 / FL)</b> | Mean   | SEM   | N   | p value<br>(Student t test)                                |
| CTRL                                      | 0.6534 | 0.116 | 8   | CTRL vs. NMDA<br>p = 0.010 (*)                             |
| NMDA                                      | 1.000  | 0.000 | 4-8 |                                                            |
| NMDA +<br>GI254023X 4h                    | 0.340  | 0.065 | 5   | NMDA + GI254023X vs. NMDA<br>4h<br>p < 0.001 (***)         |
| NMDA + DAPT 4h                            | 1.625  | 0.359 | 6   | NMDA + DAPT vs. NMDA 4h<br>p > 0.05 (n.s.)                 |
| NMDA + DAPT +<br>GI254023X 4h             | 0.880  | 0.188 | 5   | NMDA + DAPT + GI254023X vs.<br>NMDA 4h<br>p > 0.05 (n.s.)  |
| NMDA +<br>GI254023X 24h                   | 0.361  | 0.052 | 4   | NMDA + GI254023X vs. NMDA<br>24h<br>p < 0.001 (***)        |
| NMDA + DAPT 24h                           | 3.693  | 0.582 | 7   | NMDA + DAPT vs. NMDA 24h<br>p < 0.001 (***)                |
| NMDA + DAPT +<br>GI254023X 24h            | 0.934  | 0.281 | 6   | NMDA + DAPT + GI254023X vs.<br>NMDA 24h<br>p > 0.05 (n.s.) |
| <b>PCDH19</b>                             | Mean   | SEM   | N   | p value                                                    |

| (CTF2 / FL)                       |       |       |     | (Student t test)                                           |
|-----------------------------------|-------|-------|-----|------------------------------------------------------------|
| CTRL                              | 0.381 | 0.103 | 8   | CTRL vs. NMDA<br>p < 0.001 (***)                           |
| NMDA                              | 1.000 | 0.000 | 5-9 |                                                            |
| NMDA +<br>GI254023X 4h            | 0.112 | 0.057 | 5   | NMDA + GI254023X vs. NMDA<br>4h<br>p < 0.001 (***)         |
| NMDA + DAPT 4h                    | 1.861 | 0.480 | 5   | NMDA + DAPT vs. NMDA 4h<br>p > 0.05 (n.s.)                 |
| NMDA + DAPT +<br>GI254023X 4h     | 0.414 | 0.204 | 5   | NMDA + DAPT + GI254023X vs.<br>NMDA 4h<br>p = 0.020 (*)    |
| NMDA +<br>GI254023X 24h           | 0.384 | 0.173 | 6   | NMDA + GI254023X vs. NMDA<br>24h<br>p = 0.001 (**)         |
| NMDA + DAPT 24h                   | 3.618 | 0.671 | 9   | NMDA + DAPT vs. NMDA 24h<br>p = 0.021 (*)                  |
| NMDA + DAPT +<br>GI254023X 24h    | 1.059 | 0.361 | 8   | NMDA + DAPT + GI254023X vs.<br>NMDA 24h<br>p > 0.05 (n.s.) |
| <b>PCDH19<br/>(CTF3 / FL)</b>     | Mean  | SEM   | N   | p value<br>(Student t test)                                |
| CTRL                              | 0.302 | 0.081 | 9   | CTRL vs. NMDA<br>p < 0.001 (***)                           |
| NMDA                              | 1.000 | 0.000 | 4-9 |                                                            |
| NMDA +<br>GI254023X 4h            | 0.674 | 0.086 | 4   | NMDA + GI254023X 4h vs.<br>NMDA<br>p = 0.009 (**)          |
| NMDA + DAPT 4h                    | 0.677 | 0.079 | 5   | NMDA + DAPT 4h vs. NMDA<br>p = 0.003 (**)                  |
| NMDA + DAPT +<br>GI254023X 4h     | 0.542 | 0.120 | 4   | NMDA + DAPT + GI254023X 4h<br>vs. NMDA<br>p = 0.009 (**)   |
| NMDA +<br>GI254023X 24h           | 0.738 | 0.061 | 5   | NMDA + GI254023X 24h vs.<br>NMDA<br>p = 0.002 (**)         |
| NMDA + DAPT 24h                   | 1.471 | 0.247 | 9   | NMDA + DAPT 24h vs. NMDA<br>p > 0.05 (n.s.)                |
| NMDA + DAPT +<br>GI254023X 24h    | 1.282 | 0.250 | 8   | NMDA + DAPT + GI254023X<br>24h vs. NMDA<br>p > 0.05 (n.s.) |
| <b>Fig. 3E<br/>PS1 FL / GAPDH</b> | Mean  | SEM   | N   | p value<br>(One-way ANOVA & Tukey's <i>post hoc</i> )      |
| NMDA                              | 1.000 | 0.000 | 3   | NMDA + DAPT 4h vs. NMDA<br>p > 0.05 (n.s.)                 |
| NMDA + DAPT 4h                    | 0.994 | 0.055 | 3   |                                                            |
| NMDA + DAPT 24h                   | 0.911 | 0.176 | 3   | NMDA + DAPT 24h vs. NMDA<br>p > 0.05 (n.s.)                |
|                                   |       |       |     | NMDA + DAPT 24h vs. NMDA +<br>DAPT 4h<br>p > 0.05 (n.s.)   |
| <b>PS1 CTF / GAPDH</b>            | Mean  | SEM   | N   | p value<br>(One-way ANOVA & Tukey's <i>post hoc</i> )      |
| NMDA                              | 1.000 | 0.000 | 3   | NMDA + DAPT 4h vs. NMDA<br>p > 0.05 (n.s.)                 |
| NMDA + DAPT 4h                    | 1.134 | 0.059 | 3   |                                                            |
| NMDA + DAPT 24h                   | 1.814 | 0.109 | 3   | NMDA + DAPT 24h vs. NMDA<br>p < 0.001 (***)                |
|                                   |       |       |     | NMDA + DAPT 24h vs. NMDA +<br>DAPT 4h<br>p = 0.001 (**)    |

**Table S4. Mean values, SEM, number of samples and p values of data displayed in Figure 4, Related to Figure 4**

| <b>Fig. 4E</b><br>CTF3 (P2 / H) | Mean  | SEM   | N | p value<br>(One-way ANOVA & Tukey's <i>post hoc</i> )                                                     |
|---------------------------------|-------|-------|---|-----------------------------------------------------------------------------------------------------------|
| CTRL                            | 1.000 | 0.000 | 3 | CTRL vs. NMDA p > 0.05 (n.s.)<br>CTRL vs. NMDA + APV p > 0.05 (n.s.)<br>NMDA vs. NMDA + APV p = 0.027 (*) |
| NMDA                            | 2.295 | 0.505 | 3 |                                                                                                           |
| NMDA + APV                      | 0.613 | 0.275 | 3 |                                                                                                           |
| <b>Fig. 4F</b><br>CTF3 / GAPDH  | Mean  | SEM   | N | p value<br>(Student t test)                                                                               |
| H (CTRL)                        | 1.000 | 0.061 | 5 | H:<br>CTRL vs. PILO p = 0.043 (*)                                                                         |
| H (PILO)                        | 2.092 | 0.574 | 3 |                                                                                                           |
| C (CTRL)                        | 0.304 | 0.081 | 5 | C:<br>CTRL vs. PILO p = 0.003 (**)                                                                        |
| C (PILO)                        | 1.390 | 0.286 | 3 |                                                                                                           |
| CTF3 / PCDH19 FL                | Mean  | SEM   | N | p value<br>(Student t test)                                                                               |
| H (CTRL)                        | 1.000 | 0.259 | 5 | H:<br>CTRL vs. PILO p > 0.05 (n.s.)                                                                       |
| H (PILO)                        | 3.059 | 1.397 | 3 |                                                                                                           |
| N-M (CTRL)                      | 0.639 | 0.027 | 4 | N-M:<br>CTRL vs. PILO p = 0.033 (*)                                                                       |
| N-M (PILO)                      | 2.698 | 0.847 | 3 |                                                                                                           |

**Table S5. Mean values, SEM, number of samples and p values of data displayed in Figure 5, Related to Figure 5**

| <b>Fig. 5C<br/>LSD1 ChIP<br/>(% of the input)</b> | Mean  | SEM   | N | p value<br>(Student t test)                       |
|---------------------------------------------------|-------|-------|---|---------------------------------------------------|
| <i>Nr4a1</i> mock IP                              | 0.053 | 0.015 | 4 | <i>Nr4a1</i> :<br>IP mock vs. LSD1 p = 0.008 (**) |
| <i>Nr4a1</i> LSD1 IP                              | 0.137 | 0.015 | 4 |                                                   |
| <i>c-Fos</i> mock IP                              | 0.051 | 0.014 | 4 | <i>c-Fos</i> :<br>IP mock vs. LSD1 p = 0.001 (**) |
| <i>c-Fos</i> LSD1 IP                              | 0.334 | 0.051 | 4 |                                                   |
| <i>Npas4</i> mock IP                              | 0.018 | 0.008 | 4 | <i>Npas4</i> :<br>IP mock vs. LSD1 p = 0.017 (*)  |
| <i>Npas4</i> LSD1 IP                              | 0.058 | 0.008 | 4 |                                                   |
| <b>CTF ChIP<br/>(% of the input)</b>              | Mean  | SEM   | N | p value<br>(Student t test)                       |
| <i>Nr4a1</i> mock IP                              | 0.042 | 0.013 | 3 | <i>Nr4a1</i> :<br>IP mock vs. CTF p = 0.004 (**)  |
| <i>Nr4a1</i> CTF IP                               | 0.204 | 0.025 | 3 |                                                   |
| <i>c-Fos</i> mock IP                              | 0.045 | 0.018 | 3 | <i>c-Fos</i> :<br>IP mock vs. CTF p = 0.017 (*)   |
| <i>c-Fos</i> CTF IP                               | 0.253 | 0.049 | 3 |                                                   |
| <i>Npas4</i> mock IP                              | 0.010 | 0.005 | 3 | <i>Npas4</i> :<br>IP mock vs. CTF p = 0.012 (*)   |
| <i>Npas4</i> CTF IP                               | 0.088 | 0.017 | 3 |                                                   |



**Table S6. Mean values, SEM, number of samples and p values of data displayed in Figure 6, Related to Figure 6**

| <b>Fig. 6A</b><br>RT-PCR<br>(rel. mRNA level) | Mean  | SEM   | N  | p value<br>(Student t test)                                                                                                                                      |
|-----------------------------------------------|-------|-------|----|------------------------------------------------------------------------------------------------------------------------------------------------------------------|
| <i>Nr4a1</i> (CTRL)                           | 0.685 | 0.180 | 3  | <i>Nr4a1</i> :<br>CTRL vs. CTF-V5 p = 0.036 (*)                                                                                                                  |
| <i>Nr4a1</i> (CTF-V5)                         | 0.120 | 0.025 | 3  |                                                                                                                                                                  |
| <i>c-Fos</i> (CTRL)                           | 0.791 | 0.181 | 3  | <i>c-Fos</i> :<br>CTRL vs. CTF-V5 p = 0.023 (*)                                                                                                                  |
| <i>c-Fos</i> (CTF-V5)                         | 0.143 | 0.022 | 3  |                                                                                                                                                                  |
| <i>Egr1</i> (CTRL)                            | 1.008 | 0.073 | 4  | <i>Egr1</i> :<br>CTRL vs. CTF-V5 p > 0.05 (n.s.)                                                                                                                 |
| <i>Egr1</i> (CTF-V5)                          | 0.991 | 0.120 | 4  |                                                                                                                                                                  |
| <i>Cyr61</i> (CTRL)                           | 2.253 | 0.979 | 3  | <i>Cyr61</i> :<br>CTRL vs. CTF-V5 p > 0.05 (n.s.)                                                                                                                |
| <i>Cyr61</i> (CTF-V5)                         | 1.284 | 0.715 | 3  |                                                                                                                                                                  |
| <i>Npas4</i> (CTRL)                           | 1.002 | 0.314 | 3  | <i>Npas4</i> :<br>CTRL vs. CTF-V5 p = 0.043 (*)                                                                                                                  |
| <i>Npas4</i> (CTF-V5)                         | 0.080 | 0.028 | 3  |                                                                                                                                                                  |
| <b>Fig. 6B</b><br>RT-PCR<br>(rel. mRNA level) | Mean  | SEM   | N  | p value<br>(Student t test)                                                                                                                                      |
| <i>Nr4a1</i> (scramble)                       | 0.818 | 0.094 | 8  | <i>Nr4a1</i> :<br>scramble vs. shRNA p = 0.022 (*)                                                                                                               |
| <i>Nr4a1</i> (shRNA)                          | 2.394 | 0.645 | 7  |                                                                                                                                                                  |
| <i>c-Fos</i> (scramble)                       | 0.659 | 0.122 | 8  | <i>c-Fos</i> :<br>scramble vs. shRNA p > 0.05 (n.s.)                                                                                                             |
| <i>c-Fos</i> (shRNA)                          | 0.680 | 0.163 | 7  |                                                                                                                                                                  |
| <i>Egr1</i> (scramble)                        | 1.010 | 0.064 | 6  | <i>Egr1</i> :<br>scramble vs. shRNA p = 0.006 (**)                                                                                                               |
| <i>Egr1</i> (shRNA)                           | 1.582 | 0.153 | 6  |                                                                                                                                                                  |
| <i>Cyr61</i> (scramble)                       | 0.171 | 0.046 | 7  | <i>Cyr61</i> :<br>scramble vs. shRNA p > 0.05 (n.s.)                                                                                                             |
| <i>Cyr61</i> (shRNA)                          | 0.182 | 0.059 | 6  |                                                                                                                                                                  |
| <i>Npas4</i> (scramble)                       | 1.170 | 0.202 | 8  | <i>Npas4</i> :<br>scramble vs. shRNA p = 0.044 (*)                                                                                                               |
| <i>Npas4</i> (shRNA)                          | 2.898 | 0.857 | 6  |                                                                                                                                                                  |
| <b>Fig. 6C</b><br>NR4A1 intensity             | Mean  | SEM   | N  | p value<br>(One way ANOVA and Tukey's <i>post hoc</i> )                                                                                                          |
| scramble (vehicle)                            | 1.000 | 0.080 | 58 | scramble (veh.) vs. :<br>scramble (NMDA) p < 0.001 (***)                                                                                                         |
| scramble (NMDA)                               | 1.644 | 0.173 | 32 |                                                                                                                                                                  |
| CTF-V5 NLS <sub>BR1BR2</sub><br>(NMDA)        | 1.080 | 0.172 | 20 | CTF-V5 NLS <sub>BR1BR2</sub><br>(NMDA) p > 0.05 (n.s.)                                                                                                           |
| CTF-V5 NLS <sub>br1BR2</sub><br>(NMDA)        | 1.620 | 0.124 | 16 | CTF-V5 NLS <sub>br1BR2</sub><br>(NMDA) p = 0.024 (*)                                                                                                             |
| shRNA (vehicle)                               | 1.535 | 0.116 | 35 | shRNA (veh.) p = 0.006 (**)                                                                                                                                      |
| scramble (DAPT)                               | 1.000 | 0.055 | 15 | Other comparisons p > 0.05 (n.s.)                                                                                                                                |
| shRNA + PCDH19                                | 1.152 | 0.084 | 17 |                                                                                                                                                                  |
| shRNA + PCDH19<br>(DAPT)                      | 1.397 | 0.066 | 14 | scramble (DAPT) vs. :<br>shRNA + PCDH19 p > 0.05 (n.s.)<br>shRNA + PCDH19 (DAPT) p = 0.001 (**)<br>shRNA + PCDH19 vs. :<br>shRNA + PCDH19 (DAPT) p > 0.05 (n.s.) |

| <b>Fig. 6D</b><br><b>% nLSD1</b>          | Mean   | SEM   | N | p value<br>(Student t test)                                                                                 |
|-------------------------------------------|--------|-------|---|-------------------------------------------------------------------------------------------------------------|
| CTRL                                      | 62.240 | 1.372 | 6 | CTRL vs. CTF      p > 0.05 (n.s.)                                                                           |
| CTF                                       | 64.669 | 2.174 | 6 |                                                                                                             |
| scramble                                  | 55.931 | 0.435 | 6 | scramble vs. shRNA   p < 0.001 (***)                                                                        |
| shRNA                                     | 70.165 | 0.578 | 6 |                                                                                                             |
| <b>Fig. 6E</b><br><b>NOVA1 expression</b> | Mean   | SEM   | N | p value<br>(One way ANOVA and Dunnett's <i>post hoc</i> )                                                   |
| scramble                                  | 1.018  | 0.029 | 4 | scramble vs.:<br>shRNA                      p = 0.004 (**)<br>rescue                        p > 0.05 (n.s.) |
| shRNA                                     | 1.934  | 0.186 | 4 |                                                                                                             |
| rescue                                    | 0.884  | 0.214 | 3 |                                                                                                             |

**Table S7. Mean values, SEM, number of samples and p values of data displayed in Figure 7, Related to Figure 7**

| <b>Fig. 7B</b><br>PCDH19 (CTF/FL)             | Mean   | SEM   | N  | p value<br>(One-way ANOVA & Tukey's post hoc)                                                             |
|-----------------------------------------------|--------|-------|----|-----------------------------------------------------------------------------------------------------------|
| CTRL                                          | 1.000  | 0.143 | 3  | CTRL vs. NMDA p = 0.001 (**)<br>CTRL vs. NMDA + APV p > 0.05 (n.s.)<br>NMDA vs. NMDA + APV p = 0.002 (**) |
| NMDA                                          | 6.434  | 0.941 | 3  |                                                                                                           |
| NMDA + APV                                    | 1.530  | 0.381 | 3  |                                                                                                           |
| <b>Fig. 7D</b><br>Nuclear PCDH19              | Mean   | SEM   | N  | p value<br>(Student t test)                                                                               |
| CTRL                                          | 1.000  | 0.057 | 12 | CTRL vs. NMDA p < 0.001 (***)                                                                             |
| NMDA                                          | 3.196  | 0.513 | 12 |                                                                                                           |
| <b>Fig. 7E</b><br>RT-PCR<br>(rel. mRNA level) | Mean   | SEM   | N  | p value<br>(Student t test)                                                                               |
| <i>PCDH19</i> (scramble)                      | 1.000  | 0.000 | 3  | <i>PCDH19</i> :<br>scramble vs. shRNA p < 0.001 (***)                                                     |
| <i>PCDH19</i> (shRNA)                         | 0.302  | 0.050 | 3  |                                                                                                           |
| <b>Fig. 7F</b><br>RT-PCR<br>(rel. mRNA level) | Mean   | SEM   | N  | p value<br>(Student t test)                                                                               |
| <i>NR4A1</i> (scramble)                       | 0.8632 | 0.071 | 7  | <i>NR4A1</i> :<br>scramble vs. shRNA p > 0.05 (n.s.)                                                      |
| <i>NR4A1</i> (shRNA)                          | 0.8709 | 0.149 | 8  |                                                                                                           |
| <i>c-FOS</i> (scramble)                       | 0.8834 | 0.146 | 7  | <i>c-FOS</i> :<br>scramble vs. shRNA p > 0.05 (n.s.)                                                      |
| <i>c-FOS</i> (shRNA)                          | 1.134  | 0.166 | 8  |                                                                                                           |
| <i>EGR1</i> (scramble)                        | 0.8473 | 0.094 | 5  | <i>EGR1</i> :<br>scramble vs. shRNA p = 0.03 (*)                                                          |
| <i>EGR1</i> (shRNA)                           | 2.400  | 0.536 | 5  |                                                                                                           |
| <i>CYR61</i> (scramble)                       | 0.8835 | 0.079 | 5  | <i>CYR61</i> :<br>scramble vs. shRNA p > 0.05 (n.s.)                                                      |
| <i>CYR61</i> (shRNA)                          | 1.219  | 0.289 | 6  |                                                                                                           |
| <i>NPAS4</i> (scramble)                       | 1.039  | 0.039 | 4  | <i>NPAS4</i> :<br>scramble vs. shRNA p = 0.001 (**)                                                       |
| <i>NPAS4</i> (shRNA)                          | 4.549  | 0.384 | 4  |                                                                                                           |

**Table S8. Mean values, SEM, number of samples and p values of data displayed in Figures S1, S2, S3, and S5, Related to Figures 1, S1, 2, S2, 3, S3, 6 and S5**

|                                       |       |       |    |                                                                                                            |
|---------------------------------------|-------|-------|----|------------------------------------------------------------------------------------------------------------|
| <b>Fig. S1B</b><br>Nuclear PCDH19     | Mean  | SEM   | N  | p value<br>(One-way ANOVA & Dunnett's <i>post hoc</i> )                                                    |
| CTRL                                  | 1.000 | 0.060 | 9  | CTRL vs.:<br>NMDA p < 0.001 (***)<br>NMDA + APV p > 0.05 (n.s.)                                            |
| NMDA                                  | 5.649 | 0.512 | 11 |                                                                                                            |
| NMDA + APV                            | 1.970 | 0.114 | 9  |                                                                                                            |
| <b>Fig. S1D</b><br>Nuclear PCDH19-V5  | Mean  | SEM   | N  | p value<br>(One-way ANOVA & Dunnett's <i>post hoc</i> )                                                    |
| CTRL                                  | 1.000 | 0.079 | 10 | CTRL vs.:<br>NMDA p = 0.011 (*)<br>NMDA + APV p > 0.05 (n.s.)<br>BIC p = 0.002 (**)<br>TTX p > 0.05 (n.s.) |
| NMDA                                  | 1.905 | 0.173 | 21 |                                                                                                            |
| NMDA + APV                            | 1.048 | 0.169 | 6  |                                                                                                            |
| BIC                                   | 2.098 | 0.252 | 17 |                                                                                                            |
| TTX                                   | 1.415 | 0.186 | 13 |                                                                                                            |
| <b>Fig. S2A</b><br>CTF3 / GAPDH       | Mean  | SEM   | N  | p value<br>(One way ANOVA and Dunnett's <i>post hoc</i> )                                                  |
| CTRL                                  | 1.000 | 0.000 | 3  | CTRL vs.:<br>BIC p = 0.002 (**)<br>TTX p > 0.05 (n.s.)                                                     |
| BIC                                   | 1.545 | 0.069 | 3  |                                                                                                            |
| TTX                                   | 1.140 | 0.095 | 3  |                                                                                                            |
| <b>Fig. S2B</b><br>CTF3 / GAPDH       | Mean  | SEM   | N  | p value<br>(One way ANOVA and Dunnett's <i>post hoc</i> )                                                  |
| CTRL                                  | 1.000 | 0.000 | 5  | CTRL vs.:<br>NMDA p = 0.016 (*)<br>NMDA + APV p > 0.05 (n.s.)                                              |
| NMDA                                  | 4.008 | 1.163 | 5  |                                                                                                            |
| NMDA + APV                            | 1.314 | 0.234 | 5  |                                                                                                            |
| <b>Fig. S2C</b><br>CTF3 / GAPDH       | Mean  | SEM   | N  | p value<br>(Student t test)                                                                                |
| CTRL                                  | 1.000 | 0.196 | 3  | CTRL vs.<br>AMPA p > 0.05 (n.s.)                                                                           |
| AMPA                                  | 1.036 | 0.138 | 3  |                                                                                                            |
| <b>Fig. S3B</b><br>PCDH19 (CTF1 / FL) | Mean  | SEM   | N  | p value<br>(Student t test)                                                                                |
| CTRL                                  | 0.494 | 0.180 | 4  | NMDA vs. :<br>CTRL p = 0.031 (*)<br>NMDA + L-685, 458 p > 0.05 (n.s.)                                      |
| NMDA                                  | 1.000 | 0.000 | 4  |                                                                                                            |
| NMDA + L-685, 458                     | 1.167 | 0.321 | 4  |                                                                                                            |
| <b>PCDH19 (CTF2 / FL)</b>             | Mean  | SEM   | N  | p value<br>(Student t test)                                                                                |
| CTRL                                  | 0.312 | 0.083 | 4  | NMDA vs. :<br>CTRL p < 0.001 (***)<br>NMDA + L-685, 458 p > 0.05 (n.s.)                                    |
| NMDA                                  | 1.000 | 0.000 | 4  |                                                                                                            |
| NMDA + L-685, 458                     | 0.848 | 0.134 | 4  |                                                                                                            |

| <b>PCDH19 (CTF3 / FL)</b>              | Mean  | SEM   | N | p value<br>(Student t test)                                             |
|----------------------------------------|-------|-------|---|-------------------------------------------------------------------------|
| CTRL                                   | 0.280 | 0.154 | 4 | NMDA vs. :<br>CTRL p = 0.003 (**)<br>NMDA + L-685, 458 p = 0.036 (*)    |
| NMDA                                   | 1.000 | 0.000 | 4 |                                                                         |
| NMDA + L-685, 458                      | 0.623 | 0.140 | 4 |                                                                         |
| <b>Fig. S3D<br/>PCDH19 (CTF3 / FL)</b> | Mean  | SEM   | N | p value<br>(Student t test)                                             |
| CTRL                                   | 0.308 | 0.180 | 3 | NMDA vs. :<br>CTRL p = 0.018 (*)<br>NMDA + Caspase Inh. p > 0.05 (n.s.) |
| NMDA                                   | 1.000 | 0.000 | 3 |                                                                         |
| NMDA + Caspase Inh.                    | 1.566 | 0.568 | 3 |                                                                         |
| <b>Fig. S5B<br/>PCDH19 / TUBULIN</b>   | Mean  | SEM   | N | p value<br>(Student t test)                                             |
| FL (scramble)                          | 1.000 | 0.235 | 5 | scramble vs. shRNA p = 0.021 (*)                                        |
| FL (shRNA)                             | 0.289 | 0.080 | 5 |                                                                         |
| CTF1 (scramble)                        | 1.000 | 0.176 | 5 | scramble vs. shRNA p = 0.026 (*)                                        |
| CTF1 (shRNA)                           | 0.445 | 0.103 | 5 |                                                                         |
| CTF2 (scramble)                        | 1.000 | 0.171 | 5 | scramble vs. shRNA p = 0.010 (*)                                        |
| CTF2 (shRNA)                           | 0.355 | 0.092 | 5 |                                                                         |
| CTF3 (scramble)                        | 1.000 | 0.141 | 5 | scramble vs. shRNA p = 0.001 (**)                                       |
| CTF3 (shRNA)                           | 0.287 | 0.017 | 5 |                                                                         |

**Table S9. Oligonucleotides sequences used for data in Figures 4, S4, 5, 6, and 7, Related to Figures 4, S4, 5, 6, and 7**

|                    |                                                  |
|--------------------|--------------------------------------------------|
| <b>Figs. 4, S4</b> | <b>Primers for mutagenesis</b>                   |
| <b>Name:</b>       | <b>Sequence (5' - 3'):</b>                       |
| Fw                 | GGAGAAAGTGAGCCTAGCGGGAGCGGCAATTGCTGAGTACTCCTATGG |
| Rev                | CCATAGGAGTACTCAGCAATTGCCGCTCCCGCTAGGCTCACTTCTCC  |
| <b>Fig. 5</b>      | <b>Primers for ChIP experiments</b>              |
| <b>Name:</b>       | <b>Sequence (5' - 3'):</b>                       |
| Nr4a1, Fw          | GTCACGGAGCGCTTAAGATGT                            |
| Nr4a1, Rev         | TCCGCTCCGCAGTCCTTCTA                             |
| c-Fos, Fw          | TCAGAGTTGGCTGCAGCCGGC                            |
| c-Fos, Rev         | GCGTGTAGGATTTTCGGAGATG                           |
| Npas4, Fw          | AAAGGGTCTTGGGTAGGTGC                             |
| Npas4, Rev         | CCTCCGCACAGCTCTAGAAAA                            |
| <b>Fig. 6</b>      | <b>Primers for RT-PCR</b>                        |
| <b>Name:</b>       | <b>Sequence (5' - 3'):</b>                       |
| <i>RPSA</i> , Fw   | ACCCAGAGGAGATTGAGAAGG                            |
| <i>RPSA</i> , Rev  | TGGGGAAGTCTGAATGGGC                              |
| Nr4a1, Fw          | GAAGCTCATCTTCTGCTCAGG                            |
| Nr4a1, Rev         | CCATGTCTGATCAGTGATGAGG                           |
| c-Fos, Fw          | TCAGAGTTGGCTGCAGCCGGC                            |
| c-Fos, Rev         | GCGTGTAGGATTTTCGGAGATG                           |
| Egr1, Fw           | TTCAATCCTCAAGGGGAGC                              |
| Egr1, Rev          | AACCGGGTAGTTTGGCTGGGA                            |
| Cyr61, Fw          | AACGAGGACTGCAGCAAAACG                            |
| Cyr61, Rev         | TCTGAGTGAGCTCTGCAGATC                            |
| Npas4, Fw          | GGTGGTGAGACTTCAAGCCAA                            |
| Npas4, Rev         | TCCGTGTCACTGATAGGGTAG                            |
| <b>Fig. 7</b>      | <b>Primers for RT-PCR</b>                        |
| <b>Name:</b>       | <b>Sequence (5' - 3'):</b>                       |
| PCDH19, Fw         | AACGATGTGCTGAACACCAG                             |
| PCDH19, Rev        | GCATCCAGCACCTGTCAGAGT                            |
| NR4A1, Fw          | CACAGCTTGCTTGTCGATGTC                            |
| NR4A1, Rev         | ATGCCGGTCCGGTGATGAG                              |
| c-FOS, Fw          | GCGTTGTGAAGACCATGACAG                            |
| c-FOS, Rev         | TCTAGTTGGTCTGTCTCCGCT                            |
| EGR1, Fw           | ACCTGACCGCAGAGTCTTTTC                            |
| EGR1, Rev          | GTGGTTTGGCTGGGGTAACT                             |
| CYR61, Fw          | GAAGCGGCTCCCTGTTTTTG                             |
| CYR61, Rev         | CGGGTTTCTTTCACAAGGCG                             |
| NPAS4, Fw          | CTGCATCTACACTCGCAAGG                             |
| NPAS4, Rev         | GCCACAATGTCTTCAAGCTCT                            |
